# Supplementary material for: Recombinant Glycoprotein E of Varicella Zoster Virus Contains Glycan-Peptide Motifs That Modulate B Cell Epitopes into Discrete Immunological Signatures
Source: PubMed Central journal article supplement (PMC6412795; doi:10.3390/ijms20040954), 2019-02-22

**Table S1.** Determined N- and O-linked glycosylation sites within glycoprotein E (gE<sub>HP</sub>)

| Start | End | Sequence                                | Glycan modification(s)                                                                                                              |
|-------|-----|-----------------------------------------|-------------------------------------------------------------------------------------------------------------------------------------|
| 73    | 85  | KAYDHNS <u>S</u> PYIWPR                 | None; <b>HexHexNAcNeuAc(2)</b>                                                                                                      |
| 74    | 85  | AYDHNS <u>S</u> PYIWPR                  | None; <b>HexHexNAcNeuAc</b>                                                                                                         |
| 114   | 145 | LMQPTQMSAQEDLGDDTGIHVIPTLNGDDRHK        | 2 HexHexNAcNeuAc; 2 HexHexNAcNeuAc(2)                                                                                               |
| 114   | 145 | LMQPTQMSAQEDLGDDTGIHVIPTLNGDDRHK        | HexHexNAcNeuAc and HexHexNAcNeuAc(2)<br>HexHexNAcNeuAc(2)Ac and<br>HexHexNAcNeuAc(2)                                                |
| 114   | 145 | LMQPTQMSAQEDLGDDTGIHVIPTLNGDDRHK        | HexHexNAcNeuGc and HexHexNAcNeuAc(2)                                                                                                |
| 153   | 159 | QYGDVFK                                 | None                                                                                                                                |
| 153   | 165 | QYGDVFKGDLNPK                           | None                                                                                                                                |
| 153   | 170 | QYGDVFKGDLNPKPQGQR                      | None                                                                                                                                |
| 160   | 170 | GDLNPKPQGQR                             | None                                                                                                                                |
| 249   | 260 | MDSPHEYGTWVR                            | None                                                                                                                                |
| 305   | 320 | GSDGTSTYATFLVTWK                        | None                                                                                                                                |
| 305   | 324 | GSDGTSTYATFLVTWKGDEK                    | None                                                                                                                                |
| 321   | 337 | GDEKTRNP <u>T</u> PAV <u>T</u> PQPR     | <b>2 HexHexNAcNeuAc</b> ; HexHexNAc and<br>HexHexNAcNeuAc<br><b>HexHexNAc</b> ; <b>HexHexNAcNeuAc</b> ;<br><b>HexHexNAcNeuAc(2)</b> |
| 325   | 337 | TRNP <u>T</u> PAV <u>T</u> PQPR         | <b>2 HexHexNAc</b> ; <b>2 HexHexNAcNeuAc</b>                                                                                        |
| 325   | 337 | TRNP <u>T</u> PAV <u>T</u> PQPR         | <b>HexHexNAc<sup>a</sup></b> and <b>HexHexNAcNeuAc<sup>a</sup></b>                                                                  |
| 325   | 337 | TRNP <u>T</u> PAV <u>T</u> PQPR         | <b>HexHexNAcNeuAc<sup>a</sup></b> and <b>HexHexNAcNeuAc(2)<sup>a</sup></b>                                                          |
| 430   | 440 | QNCEHADNYTA                             | dHex(1)Hex(5)HexNAc(4)                                                                                                              |
| 430   | 441 | QNCEHADNYTAY                            | dHex(1)Hex(5)HexNAc(4)                                                                                                              |
| 433   | 441 | EHADNYTAY                               | dHex(1)Hex(5)HexNAc(4)                                                                                                              |
| 433   | 440 | EHADNYTA                                | dHex(1)Hex(5)HexNAc(4)                                                                                                              |
| 430   | 439 | QNCEHADNYT                              | dHex(1)Hex(5)HexNAc(4)NeuAc(1)                                                                                                      |
| 430   | 440 | QNCEHADNYTA                             | dHex(1)Hex(5)HexNAc(4)NeuAc(1)                                                                                                      |
| 433   | 439 | EHADNYT                                 | dHex(1)Hex(5)HexNAc(4)NeuAc(1)                                                                                                      |
| 433   | 441 | EHADNYTAY                               | dHex(1)Hex(5)HexNAc(4)NeuAc(1)                                                                                                      |
| 433   | 440 | EHADNYTA                                | dHex(1)Hex(5)HexNAc(4)NeuAc(1)                                                                                                      |
| 508   | 523 | GFPPTAGQPPA <u>T</u> TKPK               | <b>HexHexNAcNeuAc</b> ; <b>HexHexNAcNeuAc(2)</b>                                                                                    |
| 508   | 523 | GFPPTAGQPPA <u>T</u> TKPK               | <b>2 HexHexNAcNeuAc</b>                                                                                                             |
| 508   | 537 | GFPPTAGQPPATTKPKEITPVNPGTSPLLR          | 2 HexHexNAcNeuAc(2)                                                                                                                 |
| 508   | 537 | GFPPTAGQPPA <u>T</u> TKPKEITPVNPGTSPLLR | <b>3 HexHexNAcNeuAc</b>                                                                                                             |
| 508   | 537 | GFPPTAGQPPATTKPKEITPVNPGTSPLLR          | HexHexNAcNeuAc; HexHexNAcNeuAc(2)                                                                                                   |
| 508   | 537 | GFPPTAGQPPATTKPKEITPVNPGTSPLLR          | HexHexNAcNeuAc and HexHexNAcNeuAc(2)                                                                                                |
| 508   | 537 | GFPPTAGQPPATTKPKEITPVNPGTSPLLR          | 4-6 HexHexNAcNeuAc                                                                                                                  |
| 524   | 537 | EITPVNPGTSPLLR                          | None; <b>HexHexNAcNeuAc</b> ; HexHexNAcNeuAc(2)                                                                                     |
| 524   | 537 | EITPVNPGTSPLLR                          | HexHexNAcNeuAc and HexHexNAcNeuAc(2)                                                                                                |

Bold and underlined Ser/Thr residues were identified as glycosylation sites from the ETD spectra analysis. The corresponding structures in bold were assigned to those sites. Non-bold structures were only identified in the HCD spectra analysis. <sup>a</sup> denotes that both glycans were pinpointed to each site. N-glycopeptides were identified from the pronase sample.

**Table S2.** Reactivity of VZV-positive and VZV-negative sera towards a panel of synthetic peptides/glycopeptides representing VZV gE<sup>1</sup>.

| Range of sequence | Complete peptide sequence | Number of VZV+ sera showing reactivity <sup>2</sup> | Number of VZV- sera showing reactivity <sup>3</sup> | Glycan modification verified in gE <sub>HP</sub> |
|-------------------|---------------------------|-----------------------------------------------------|-----------------------------------------------------|--------------------------------------------------|
| W64 – Y81         | WVNRGESSRKAYDHNSPY        | 3                                                   | 1                                                   | n.a.                                             |
| W64 – Y81         | WVNRGES*S*RKAYDHNSPY      | 0                                                   | 0                                                   | -                                                |
| W64 – Y81         | WVNRGES*S*RKAY*DHNSPY     | 0                                                   | 1                                                   | -                                                |
| W64 – Y81         | WVNRGESS*RKAYDHNSPY       | 0                                                   | 0                                                   | -                                                |
| W64 – Y81         | WVNRGESSRKAYDHNS*PY       | 0                                                   | 1                                                   | +                                                |
| W64 – Y81         | WVNRGESSRKAY*DHNSPY       | 0                                                   | 2                                                   | -                                                |
| W64 – Y81         | WVNRGES*SRKAYDHNSPY       | 2                                                   | 2                                                   | -                                                |
| K73 – G90         | KAYDHNSPYIWPRNDYDG        | 10                                                  | 4                                                   | n.a.                                             |
| K73 – G90         | KAY*DHNSPYIWPRNDYDG       | 2                                                   | 1                                                   | -                                                |
| K73 – G90         | KAYDHNS*PYIWPRNDYDG       | 1                                                   | 0                                                   | +                                                |
| K73 – G90         | KAYDHNSPYIWPRNDY*DG       | 1                                                   | 1                                                   | -                                                |
| K73 – G90         | KAYDHNSPY*IWPRNDYDG       | 1                                                   | 1                                                   | -                                                |
| V101 – M120       | VYNQGRGIDSGERLMQPTQM      | 4                                                   | 0                                                   | n.a.                                             |
| V101 – M120       | VYNQGRGIDSGERLMQPT*QM     | 0                                                   | 0                                                   | + <sup>#</sup>                                   |
| G111 – T130       | GERLMQPTQMSAQEDLGDDT      | 0                                                   | 0                                                   | n.a.                                             |
| G111 – T130       | GERLMQPT*QMSAQEDLGDDT     | 0                                                   | 0                                                   | + <sup>#</sup>                                   |
| G111 – T130       | GERLMQPT*QMS*AQEDLGDDT    | 0                                                   | 1                                                   | + <sup>#</sup>                                   |
| G111 – T130       | GERLMQPTQMS*AQEDLGDDT     | 2                                                   | 0                                                   | + <sup>#</sup>                                   |
| S121 - G140       | SAQEDLGDDTGIHVIPT*LNG     | 3                                                   | 0                                                   | +                                                |
| S121 - G140       | S*AQEDLGDDTGIHVIPT*LNG    | 3                                                   | 2                                                   | + <sup>#</sup>                                   |
| S121 - G140       | S*AQEDLGDDTGIHVIPTLNG     | 3                                                   | 0                                                   | + <sup>#</sup>                                   |
| S121 - G140       | SAQEDLGDDTGIHVIPTLNG      | 3                                                   | 0                                                   | n.a.                                             |

|                          |                      |   |   |      |
|--------------------------|----------------------|---|---|------|
| G131 – D150              | GIHVIPT*LNDDRHKIVNVD | 0 | 2 | +    |
| G131 – D150              | GIHVIPTLNDDRHKIVNVD  | 0 | 0 | n.a. |
| R190 – T207              | RIYGVRYTETWSFLPS*LT  | 0 | 0 | -    |
| T199 – I216              | TWSFLPS*LTCTGDAAPAI  | 1 | 1 | -    |
| L316 – T333              | LVTWKGDEKTRNPT*PAVT  | 0 | 1 | +    |
| T329 – W344              | TPAVT*PQPRGAEFHMW    | 0 | 0 | +    |
| T325 – H342              | TRNPTPAVTPQPRGAEFH   | 0 | 0 | n.a. |
| T325 – H342              | TRNPT*PAVTPQPRGAEFH  | 0 | 1 | +    |
| T325 – H342              | TRNPTPAVT*PQPRGAEFH  | 0 | 0 | +    |
| L379 – C396 <sup>‡</sup> | LYVPIDPT*CQPMRLYSTC  | 8 | 9 | -    |
| L406 – R423              | LSHMMSGCTFTS*PHLAQR  | 1 | 0 | -    |
| L406 – R423              | LSHMMSGCTFTSPHLAQR   | 0 | 0 | n.a. |
| L406 – R423              | LSHMMSGCTFT*SPHLAQR  | 0 | 0 | -    |
| A421 – A440              | AQRVASTVYQNCHEADNYTA | 1 | 0 | n.a. |
| N431 – P450              | NCEHADNYTAYCLGISHMEP | 0 | 0 | n.a. |
| C442 – G459              | CLGISHMEPS*FGLILHDG  | 0 | 0 | -    |
| G460 – V477              | GTTLKFVDTPESLS*GLYV  | 4 | 1 | -    |
| G460 – V477              | GTTLKFVDTPESLSGLYV   | 0 | 0 | n.a. |
| G460 – V477              | GTTLKFVDTPES*LSGLYV  | 0 | 0 | -    |
| G460 – V477              | GTTLKFVDT*PESLSGLYV  | 0 | 0 | -    |
| E487 – I504              | EAVAYTVVSTVDHFVNAI   | 0 | 2 | n.a. |
| E487 – I504              | EAVAYTVVS*TVDHFVNAI  | 0 | 0 | -    |
| E487 – I504              | EAVAYTVVST*VDHFVNAI  | 0 | 4 | -    |
| H499 – G514              | HFVNAIEERGFPPPT*AG   | 0 | 0 | +    |
| E505 – P522              | EERGFPPPTAGQPPATT*KP | 1 | 1 | +    |
| E505 – P522              | EERGFPPPTAGQPPATTKP  | 0 | 0 | n.a. |
| E505 – P522              | EERGFPPPT*AGQPPATTKP | 0 | 2 | +    |
| E505 – P522              | EERGFPPPTAGQPPAT*TKP | 4 | 3 | +    |

|             |                     |   |   |      |
|-------------|---------------------|---|---|------|
| R507 – P522 | RGFPPTAGQPPAT*TKP   | 1 | 0 | +    |
| R507 – P522 | RGFPPTAGQPPATT*KP   | 0 | 0 | +    |
| R507 – P522 | RGFPPT*AGQPPATTKP   | 1 | 1 | +    |
| R507 – P522 | RGFPPTAGQPPATT*KP   | 0 | 1 | +    |
| G514 – G531 | GQPPAT*TKPKEITPVNPG | 3 | 2 | +    |
| G514 – G531 | GQPPATTKPKEITPVNPG  | 4 | 3 | n.a. |
| G514 – G531 | GQPPATT*KPKEITPVNPG | 0 | 2 | +    |
| G514 – G531 | GQPPATTKPKEIT*PVNPG | 4 | 4 | +    |
| Q515 – G531 | QPPATT*KPKEITPVNP   | 0 | 0 | +    |
| Q515 – G531 | QPPAT*TKPKEITPVNP   | 0 | 0 | +    |
| Q515 – G531 | QPPATTKPKEIT*PVNP   | 1 | 1 | +    |
| K523 – Y538 | KEIT*PVNPGTSPLLR    | 3 | 1 | +    |
| K523 – A540 | KEITPVNPGTS*PLLR    | 3 | 2 | +    |
| K523 – A540 | KEITPVNPGT*SPLLR    | 0 | 2 | +    |
| K523 – A540 | KEITPVNPGTSPLLR     | 3 | 2 | n.a. |

<sup>1</sup> The synthetic peptides were immobilized on a glass slide and incubated with sera from VZV positive (individual serum samples n=11 and pooled serum samples n=2) and negative (individual serum samples n=11 and pooled serum samples n=2) individuals and the intensity of fluorescence determined. Serum samples with a relative fluorescence value higher than two standard deviations over the mean of the control group were designated positive. The portion of gE spanning W64–D135 was previously shown to constitute a linear B cell epitope [30]. <sup>2</sup> Serum samples were assigned as VZV-positive using ELISA and immunofluorescence microscopy. <sup>3</sup> Serum samples that did not show reactivity with ELISA nor immunofluorescent microscopy were determined as VZV-negative. n.a. = not assigned, \* indicates addition of a GalNAc residue to Ser, Thr or Tyr, # indicate that the glycosylation sites could not be unambiguously assigned, ‡ the peptide was synthesized with a GalNAc residue present at Thr-386 but this modification was not observed in gE<sub>HP</sub> or gE<sub>L</sub> as determined by LC-MS/MS indicating that the observed reactivity could represent cross reactivity with other viral or human proteins



Fig. S1

1 MGTVNKPVVG VLMGFGIITG TLRITNPVRA SVLRYDDFHI DEDKLDTNSV  
51 YEPY**YHSDHA** **ESSWVNRGES** **SRKAYDHN**S**P** **YIWPRNDYDG** **FLENAHEHHG**  
101 **VYNQGRGIDS** **GERLMQP**I**\*QM** **S\*~~S~~AQEDLGDDT** **GIHVIP**I**LNG** **DDRHKIVNVD**  
151 **QRQYGDVFKG** **DLNPKPQGQR** **LIEVSVEENH** **PFTLR**APIQR IYGVRYTETW  
201 SFLPSLTCTG **DAAPAIQHIC** LKHTTCFQDV VVDVDC**AENT** **KEDQLAEISY**  
251 **RFQGK**KEADQ**** **PWIVVN\*\*TSTL** **FDELELDPE** **IEPGVLKCLR** TEKQYLGVI  
301 WNM**R**GSDGTS**** **TYATFLVTWK** **GDEKTRNP**I**P** **AV**I**PQPRGAE** **FHMWNYHSHV**  
351 **FSVGDTFSLA** **MHLQYKIHEA** **PFDLLEWLY** **VPIDPTCQPM** RLYSTCLYHP  
401 **NAPQCLSHMN** **SGCTFTSPHL** **AQRVASTVYQ** **NCEHAD**N**YTA** **YCLGISHMEP**  
451 **SFGLILDGG** **TTLKFVDTP** **SLSGLYVFVV** YFNGHVEAVA YTVVSTVDHF  
501 VNA**IEERGFP** **P**I**AGQPP**A**I**** **KPKE**I**PVNP** **G**I**SPLL**R**YA****

**TRYPSIN, PRONASE, BOTH.** \*One of these is glycosylated. \*\* Not observed but possible N-glycosylation site.

Fig. S2

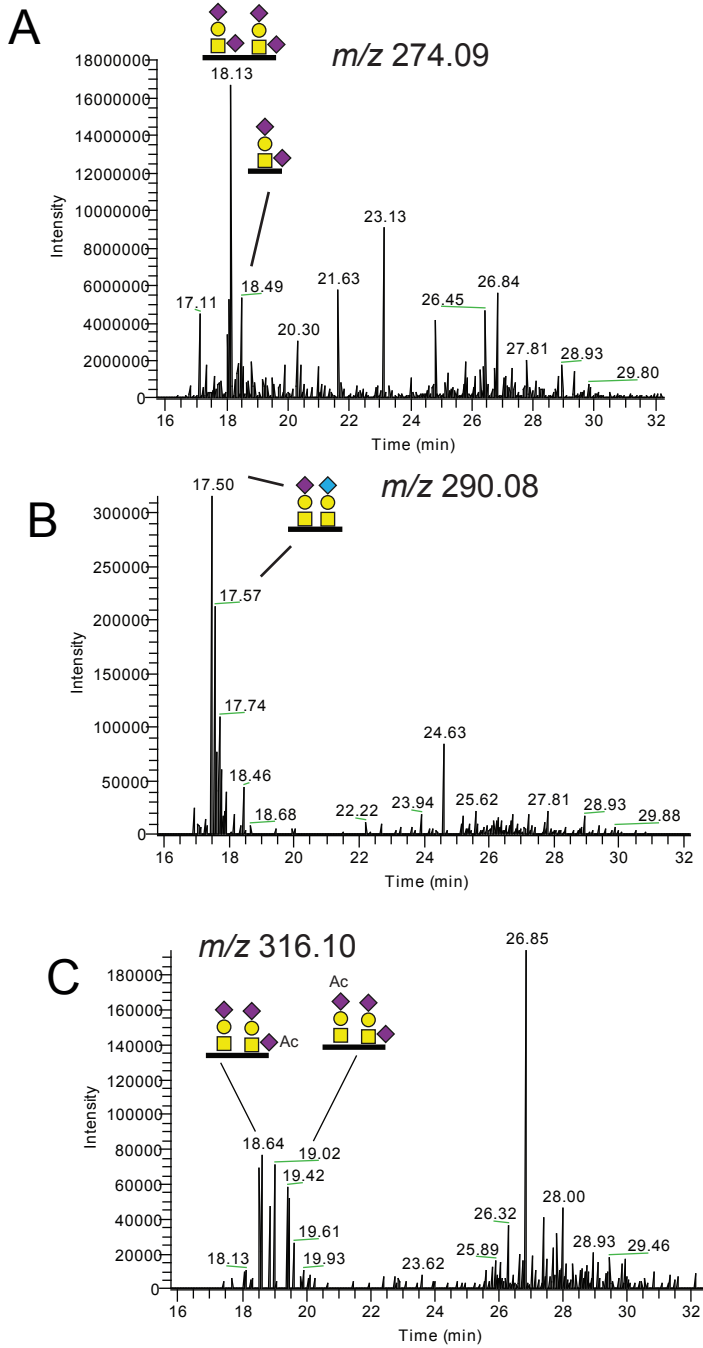

Fig. S3

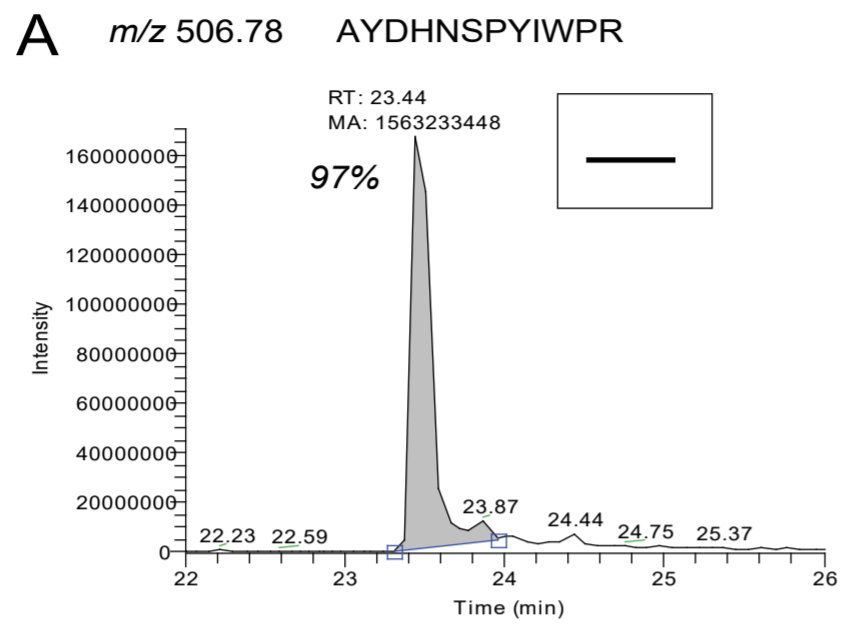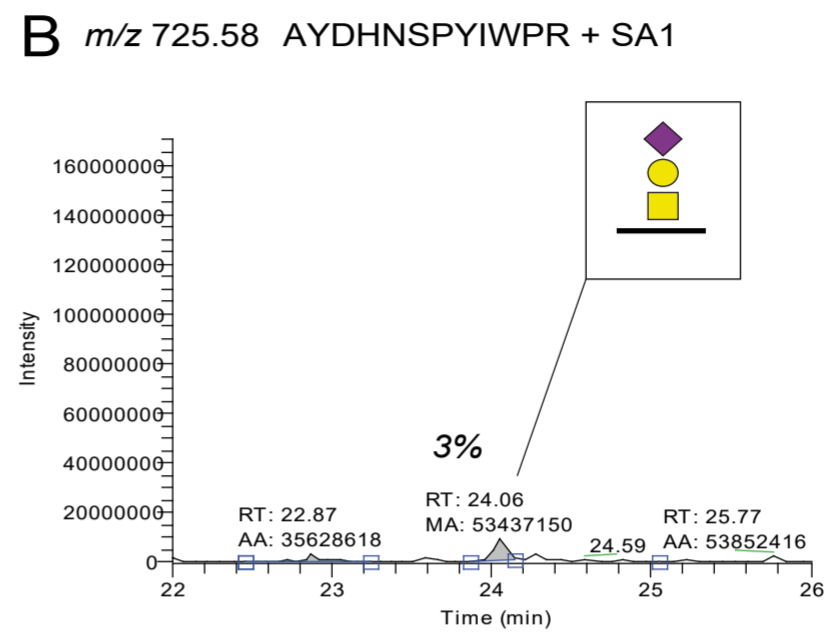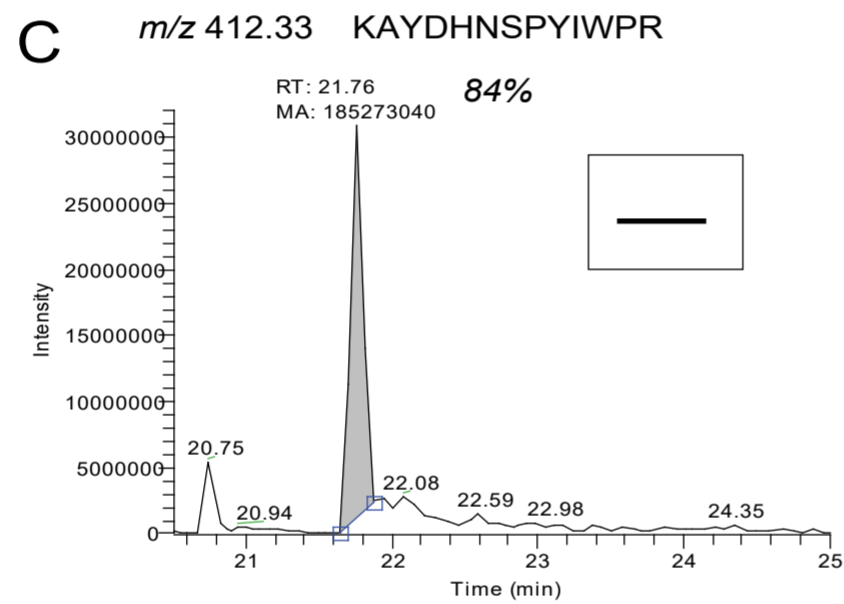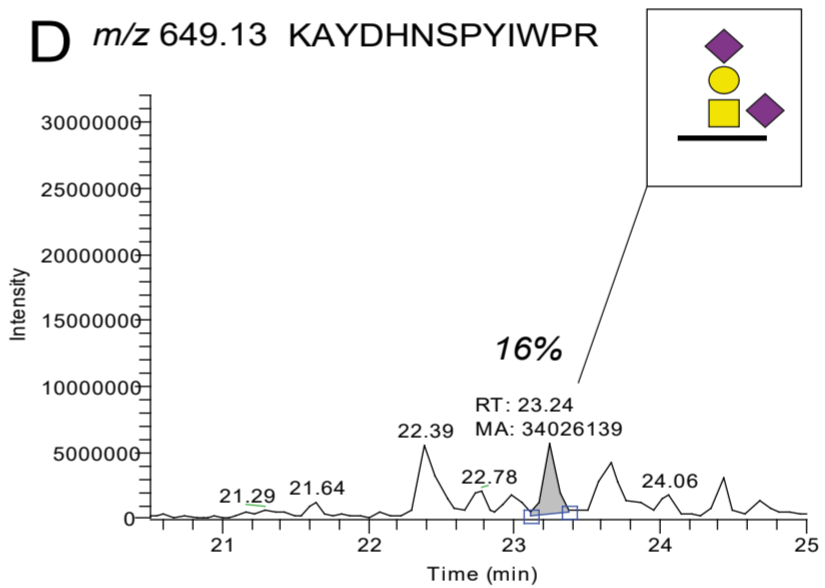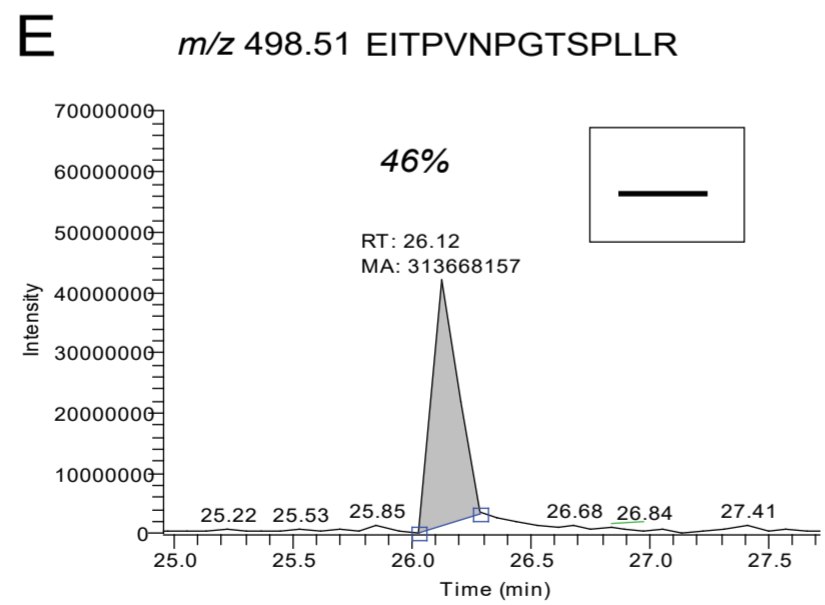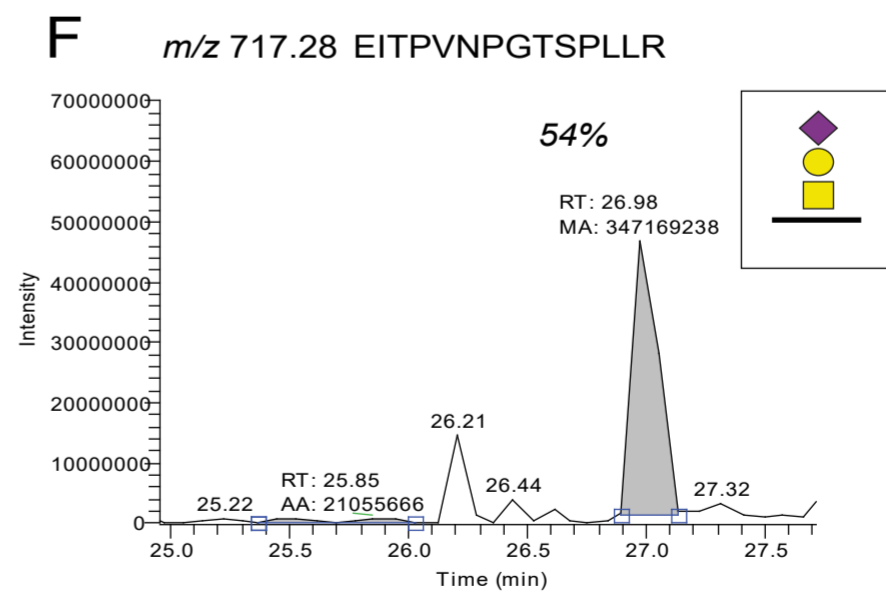

# Fig. S4

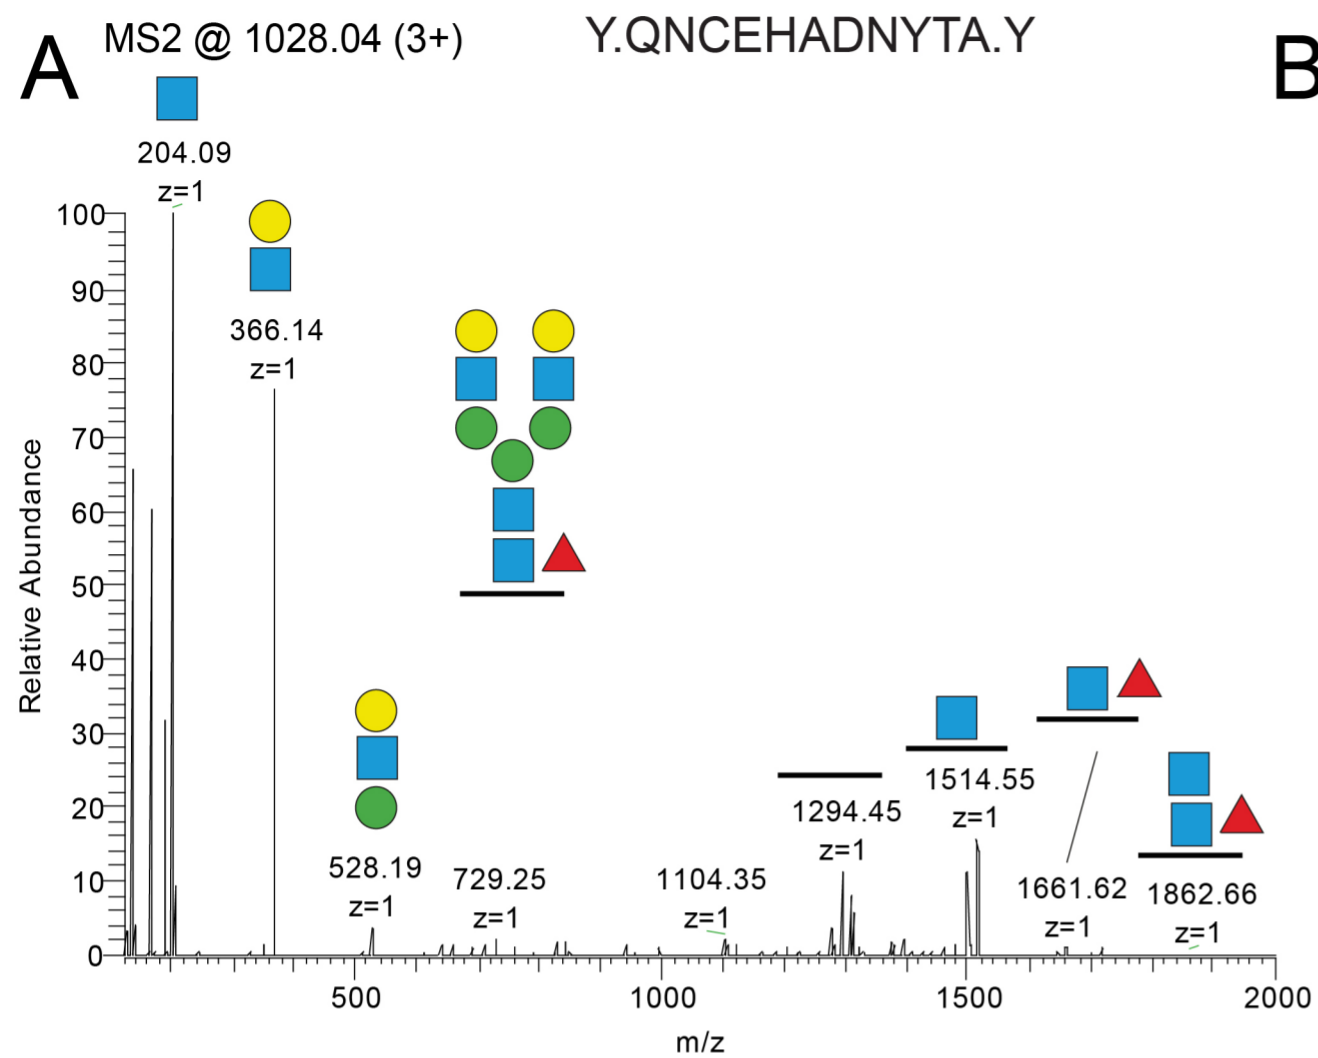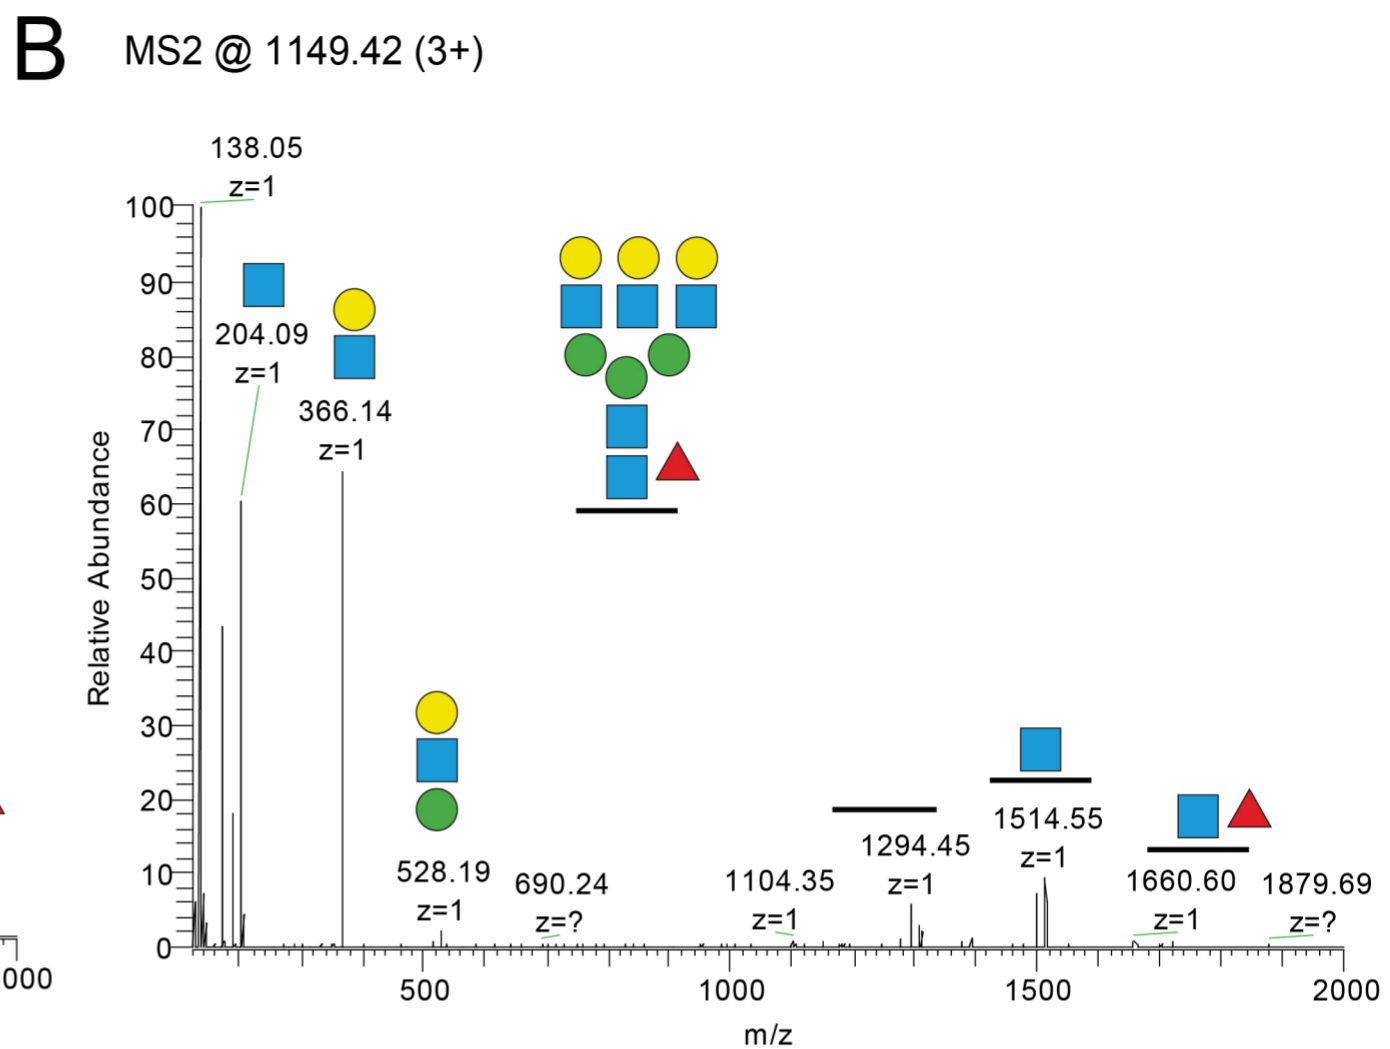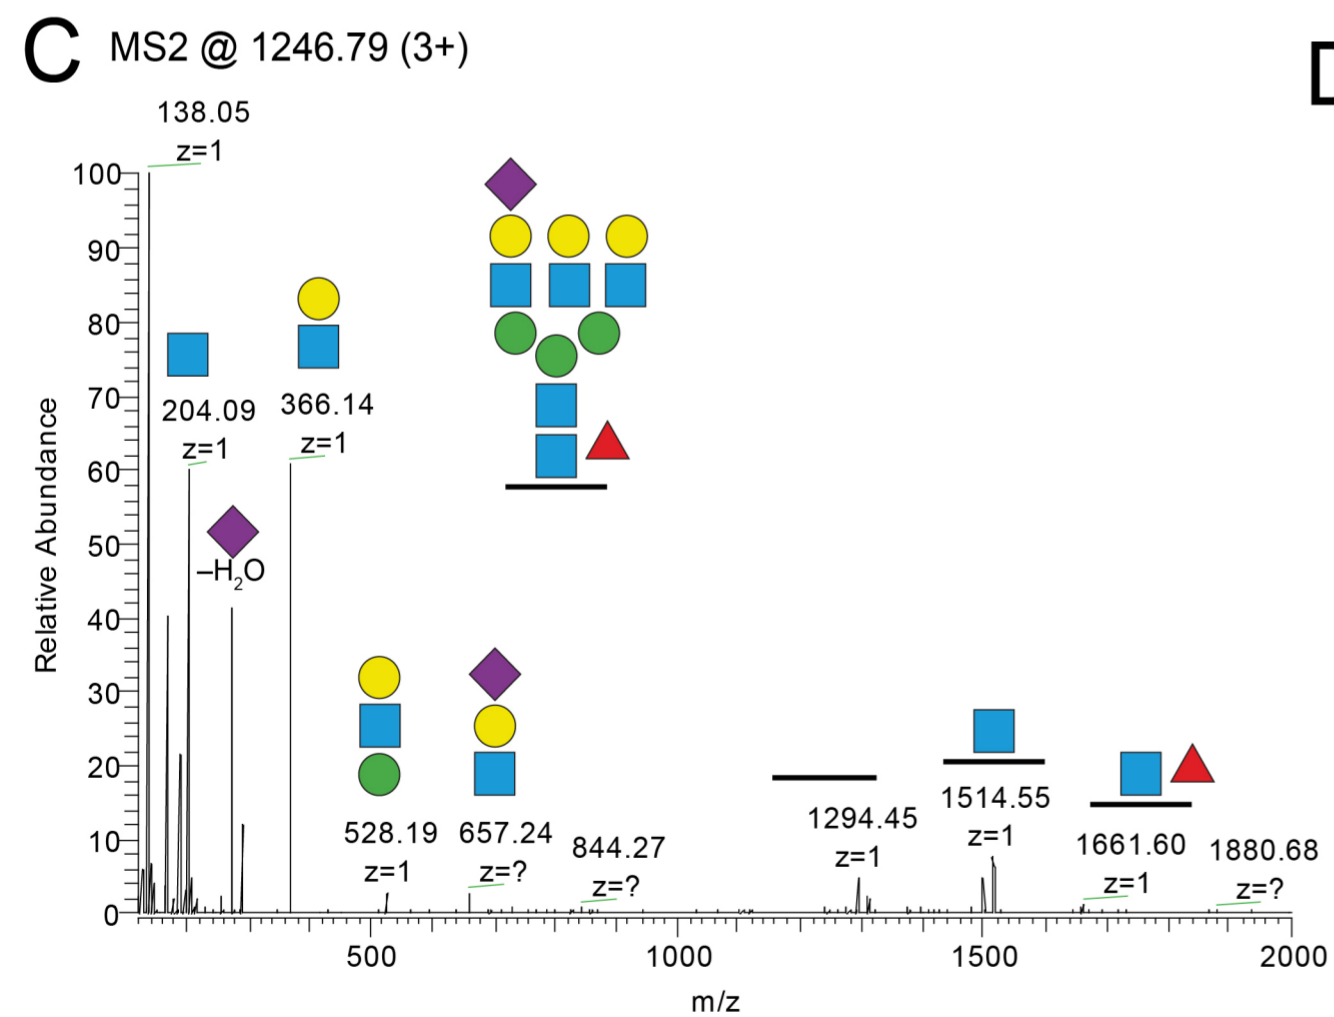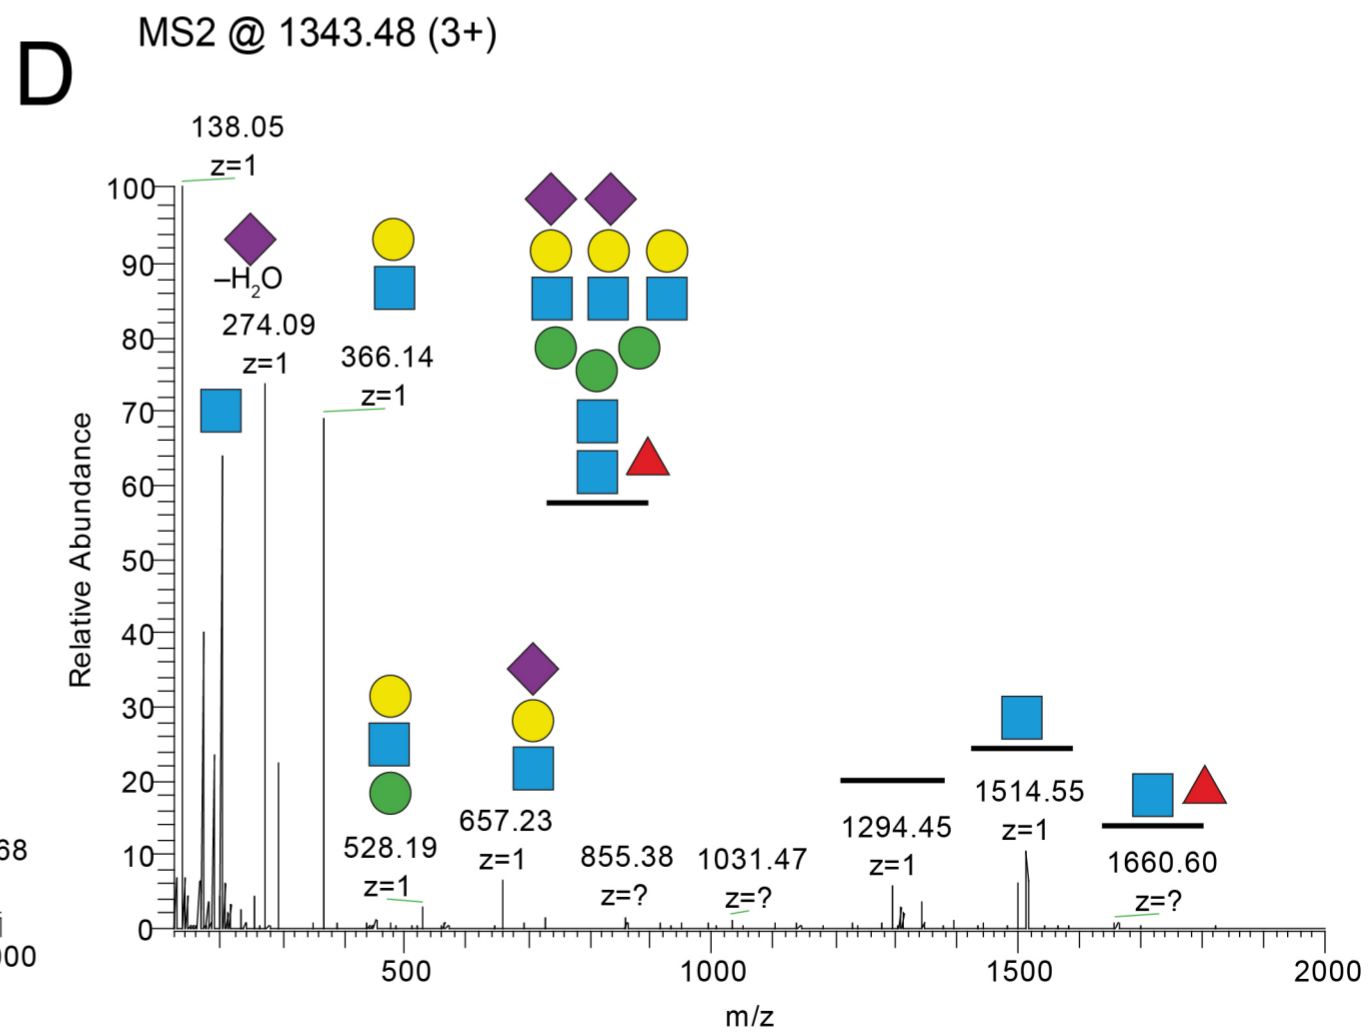

Fig. S5

A

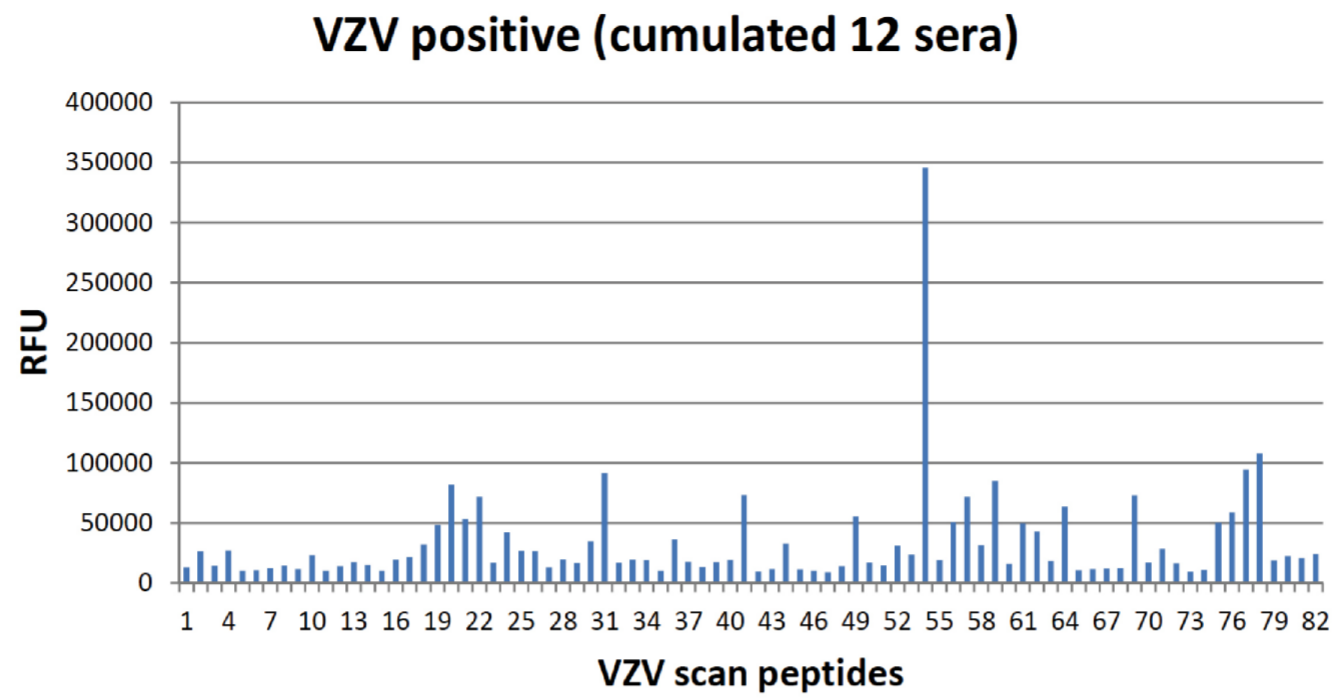

B

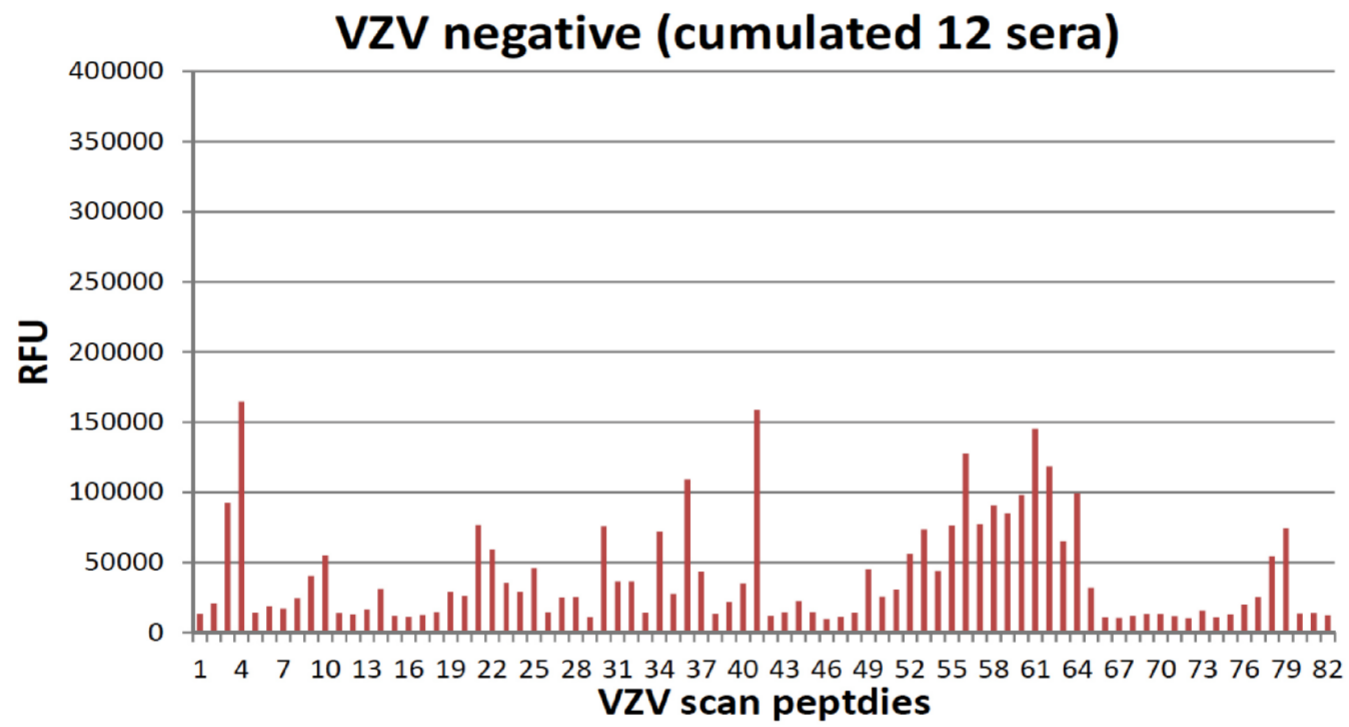

C

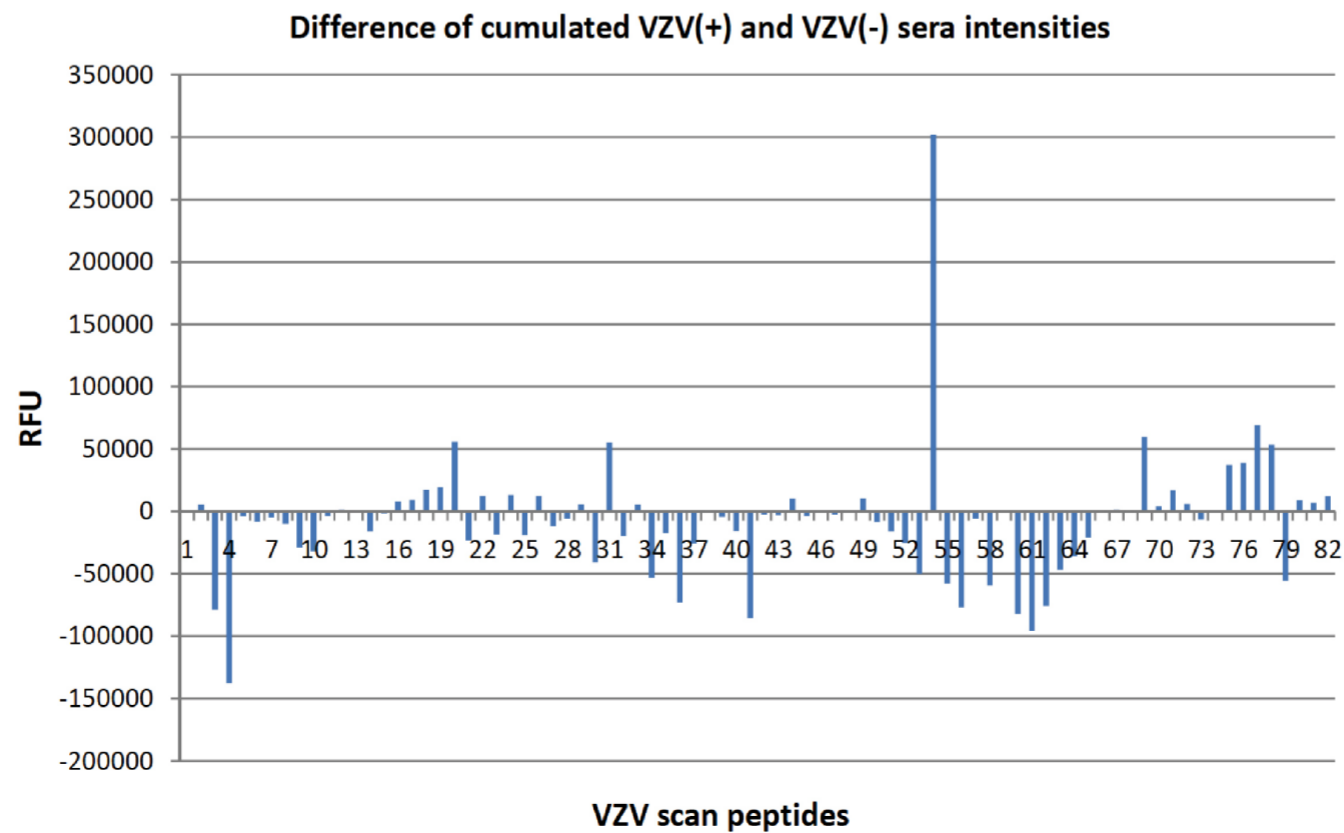

Supplement: ijms-20-00954-s001.pdf [file ijms-20-00954-s001.pdf]
